# Supplementary material for: Z-type heterojunction degradation of tetracycline by 2D g-C3N4 with 3D oxygen vacancy Bi2WO6
Source: Royal Society of Chemistry journal article supplement (doi:10.1039/d4cp02969k), 2024-12-19
Supplement: d4cp02969k1.pdf [file d4cp02969k1.pdf]

## Supporting Information

### **Z-type heterojunction degradation of tetracycline by 2D g-C<sub>3</sub>N<sub>4</sub> with 3D oxygen vacancy Bi<sub>2</sub>WO<sub>6</sub>**

*Xiao Kang, Xiangyan Li, Abulikemu Abulizi, Mihiriguli Abulimiti, Nuerla Ailijiang, Anwar Mamat\**

\* Corresponding author

Xiao Kang, Xiangyan Li, Abulikemu Abulizi, Mihiriguli Abulimiti, Anwar Mamat  
State Key Laboratory of Chemistry and Utilization of Carbon Based Energy Resources,  
Key Laboratory of Oil & Gas Fine Chemicals, Ministry of Education & Xinjiang  
Uyghur Autonomous Region, School of Chemical Engineering and Technology,  
Xinjiang University, Urumqi 830017, P.R. China.

E-mail: [anwarm@xju.edu.cn](mailto:anwarm@xju.edu.cn) <https://orcid.org/0009-0006-0387-1612>

Nuerla Ailijiang

Key Laboratory of Oasis Ecology of Education Ministry, College of Ecology and  
Environment, Xinjiang University, Urumqi 830017, P.R. China.

## **Text S1 Materials**

Melamine ( $C_3H_6N_6$ ) was purchased from Shanghai Shanpu Chemical Co. Bismuth nitrate ( $Bi(NO)_3 \cdot 5H_2O$ ) was purchased from Shanghai McLean Biochemical Technology Co. Sodium tungstate ( $NaWO_4 \cdot 2H_2O$ ) was purchased from Tianjin Xinbute Chemical Co. CTAB ( $C_{19}H_{42}BrN$ ) and ammonia ( $NH_3 \cdot H_2O$ ) were purchased from Tianjin Zhiyuan Chemical Reagent Co. Sulfuric acid ( $H_2SO_4$ ), methanol ( $CH_3OH$ ), sulfuric acid ( $H_2SO_4$ ), and nitric acid ( $HNO_3$ ) were purchased from Sichuan Xilong Science Co.

## **Text S2 Characterizations**

The physical phases and compositions of the samples were characterized by powder X-ray diffraction (XRD, Rigaku, Japan), the chemical structures of the samples were analyzed by Fourier transform infrared spectroscopy (FT-IR), the morphologies of the photocatalysts were further investigated by emission scanning electron microscopy, and the surface elemental compositions of the photocatalysts were determined by energy dispersive X-ray spectroscopy (EDS). For further morphological and structural evaluation, the chemical composition and valence states of the photocatalysts were determined by X-ray photoelectron spectroscopy (XPS, Thermo Fisher Scientific), the exact surface area of the photocatalysts was determined by Brunauer–Emmet–Teller (BET, Autosorb-iQ), and the surface area of the photocatalysts was determined by UV–VIS diffuse reflectance spectroscopy (UV–Vis). UV–Vis Diffuse Reflectance spectroscopy (UV–Vis DRS, Jasco) was used to detect the absorption wavelengths of the photocatalysts and calculate their band gap energies. Steady-state and transient fluorescence tests were conducted on an Edinburgh FLS1000 instrument in the United Kingdom, while electron paramagnetic resonance (EPR) tests were conducted on a Bruker EMXplus-6/1 instrument in Germany.

### **Text S3 Photoelectrochemical measurements**

Photoelectrochemical measurements of the prepared samples were conducted on a CHI 660E Electrochemical Workstation equipped with a conventional three-electrode electrochemical system. The as-prepared samples were deposited on ITO ( $0.5 \times 1.5$  cm) to serve as the working electrode. A Pt wire was used as the counter electrode, while an Ag/AgCl electrode was used as the reference electrode. A  $\text{Na}_2\text{SO}_4$  solution (0.5 M) was used as the electrolyte. The working electrodes were prepared via the following method: 5 mg obtained catalyst sample, previously dissolved in 1 mL ethanol with 10  $\mu\text{L}$  Nafion, was dropped to disperse uniformly on the ITO glass. Subsequently, the photocatalyst-coated ITO glass was annealed for 10 h in a drying oven at 80 °C.

**Table R1 Catalyst properties for degrading pollutants.**

| <b>Materials</b>                    | <b>Catalyst</b>                                                                                 | <b>Degradable material</b> | <b>Degradation efficiency</b> | <b>Reference</b> |
|-------------------------------------|-------------------------------------------------------------------------------------------------|----------------------------|-------------------------------|------------------|
| <b>g-C<sub>3</sub>N<sub>4</sub></b> | <b>g-C<sub>3</sub>N<sub>4</sub>/Bi<sub>2</sub>O<sub>3</sub></b>                                 | <b>THM</b>                 | <b>84.6%</b>                  | <b>1</b>         |
|                                     | <b>g-C<sub>3</sub>N<sub>4</sub>/Bi<sub>2</sub>MoO<sub>6</sub></b>                               | <b>Estradiol</b>           | <b>96%</b>                    | <b>2</b>         |
|                                     | <b><math>\alpha</math>-Fe<sub>2</sub>O<sub>3</sub>/g-C<sub>3</sub>N<sub>4</sub></b>             | <b>MB</b>                  | <b>88%</b>                    | <b>3</b>         |
|                                     | <b><math>\alpha</math>-Fe<sub>2</sub>O<sub>3</sub>/g-C<sub>3</sub>N<sub>4</sub></b>             | <b>MO</b>                  | <b>38%</b>                    | <b>3</b>         |
|                                     | <b><math>\alpha</math>-Fe<sub>2</sub>O<sub>3</sub>/g-C<sub>3</sub>N<sub>4</sub></b>             | <b>Phenol</b>              | <b>60%</b>                    | <b>3</b>         |
| <b>Others</b>                       | <b>ZnO (CuNi-ZnO)</b>                                                                           | <b>IC</b>                  | <b>93.32%</b>                 | <b>4</b>         |
|                                     | <b>CeO/ZnO</b>                                                                                  | <b>TC</b>                  | <b>95.9%</b>                  | <b>5</b>         |
|                                     | <b>Cu<sub>2</sub>V<sub>2</sub>O<sub>7</sub>/<math>\alpha</math>-Fe<sub>2</sub>O<sub>3</sub></b> | <b>MB</b>                  | <b>88%</b>                    | <b>6</b>         |
|                                     | <b>WO<sub>3</sub>/AgI</b>                                                                       | <b>CTC</b>                 | <b>88.1%</b>                  | <b>7</b>         |

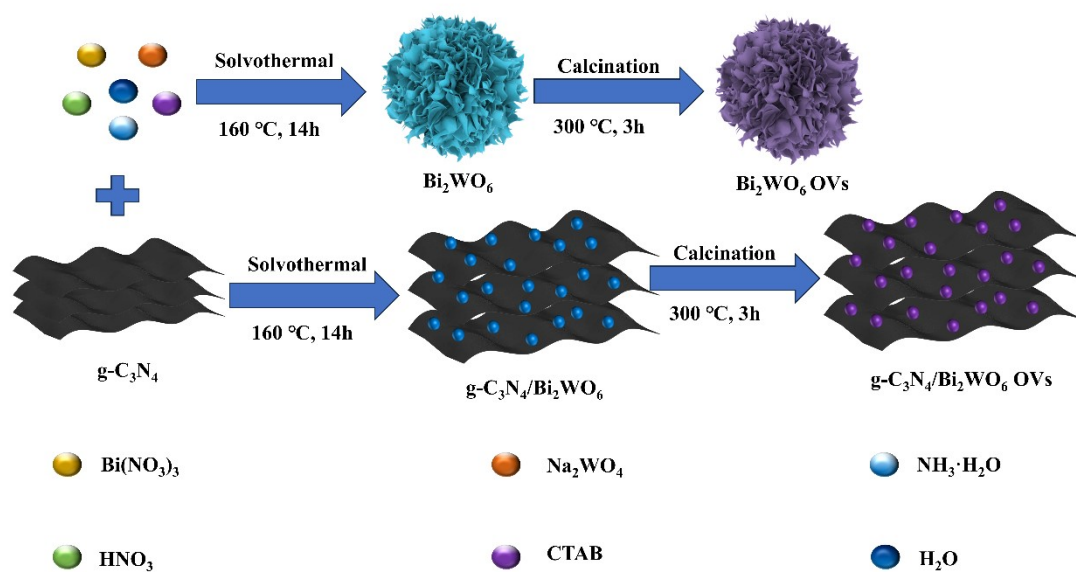

Fig. S1. The preparation process of BWO and CN/BWO OV catalysts

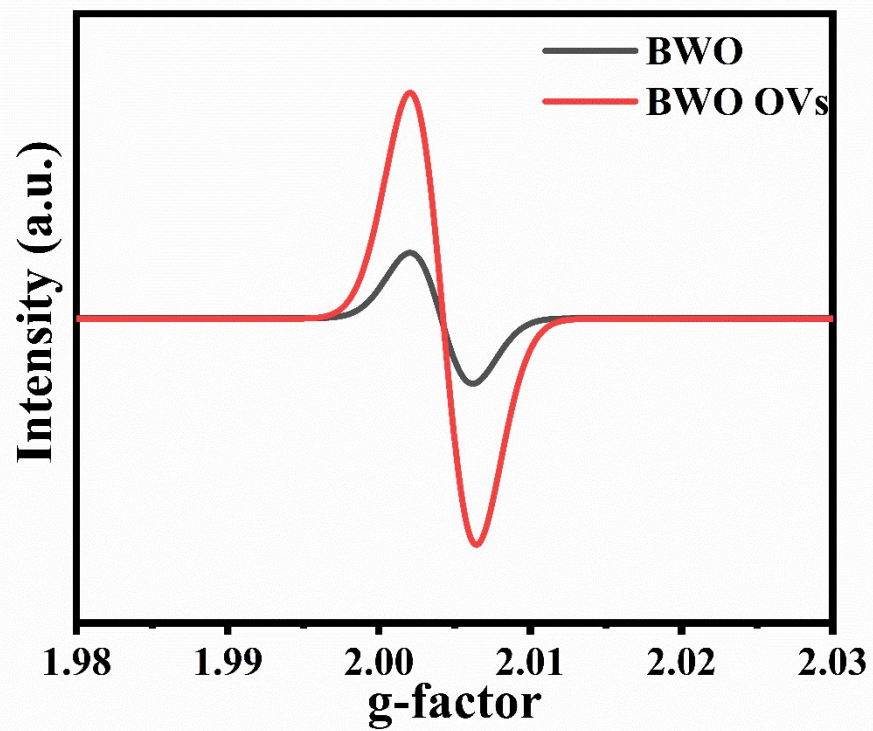

Fig. S2. ESR spectra of pure  $\text{Bi}_2\text{WO}_6$  and  $\text{Bi}_2\text{WO}_6$  OVs.

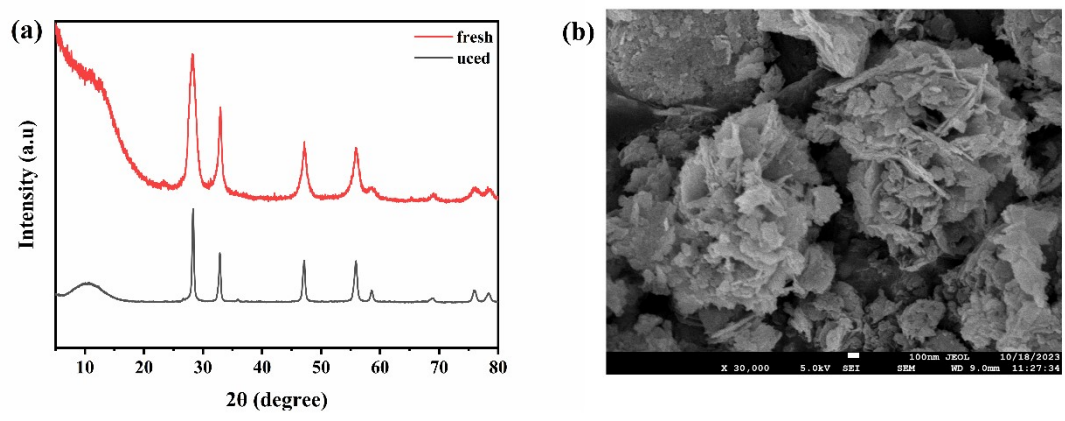

Fig. S3. XRD images of CN/BWO OVS 30% catalyst before and after reaction (a), and the SEM image of CN/BWO OVs30% catalyst after reaction (b).

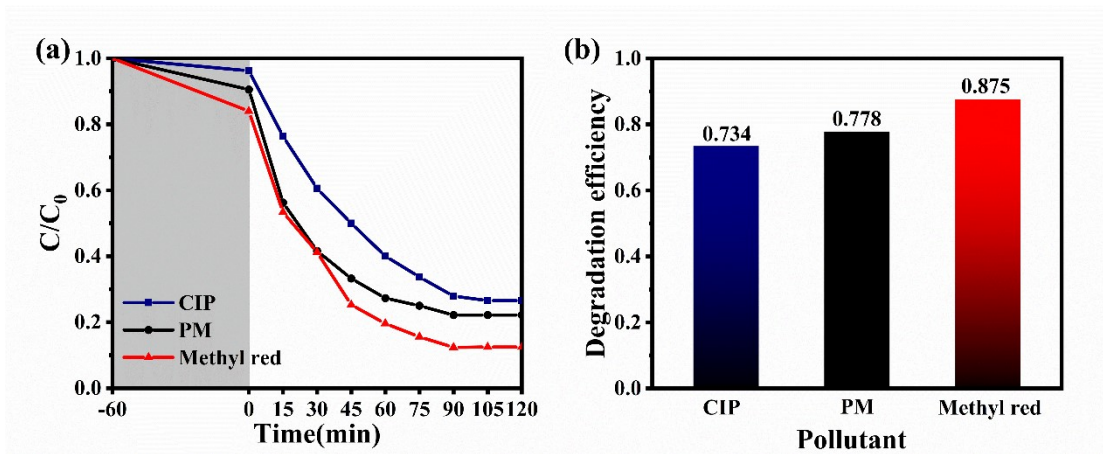

Fig. S4. Degradation of other pollutants



## References

1. *Chemical Engineering Journal*, 2024, **499**.
2. Z. F. Lin, H. Y. Lin, R. A. Doong and A. I. Schfer, *Journal of Hazardous Materials*, 2024, **476**.
3. K. Kalantarian and S. Sheibani, *Ceramics International*, 2024, DOI: 10.1016/j.ceramint.2024.08.127.
4. R. Kumar and R. S. Gedam, *Ceramics International*, 2024, DOI: 10.1016/j.ceramint.2024.04.208.
5. J. Huang, M. Lu, P. Wei, Y. Xie, H. Xie, M. Liu, L. Li, J. Hu, Z. Zhang and Y. Qi, *Journal of Environmental Chemical Engineering*, 2024, DOI: 10.1016/j.jece.2024.113074.
6. F. Li, X. Li, S. Tong, J. Wu, T. Zhou, Y. Liu and J. Zhang, *Nano Energy*, 2023, DOI: 10.1016/j.nanoen.2023.108849.
7. C. Wang, X. Li, X. Lv, X. Huang, Y. Zhao, T. Deng, J. Zhang, J. Wan, Y. Zhen and T. Wang, *Journal of Cleaner Production*, 2024.
